# Supplementary material for: Restoration as a Pathway to Invasion: Early Management of Scaevola taccada in a Protected Restinga
Source: Research Square preprint supplement (doi:10.21203/rs.3.rs-8700445/v1), 2026-02-19
Supplement: Supplementary file 1 [file 9735fa7ea2918a9e83dbe68a.docx]

Suplementary Matherial for:

**When Restoration Opens the Door to Invasion: Early Management of**

***Scaevola taccada* in a Protected Restinga**

**SM 1** – Table of individual measurements of the Scaevola shrubs at the RBEPS (Estate Biological Reserve of the Praia do Sul). According to origin: the native species: *Scaevola plumieri* and Exotic species: *Scaevola taccada.* Measurements of major (d1) and minor (d2) crown projections, height and calculated crown area (see methods).

| **n** | **Origin** | **d1 (crown projection)** | **d2 (crown projection)** | **height (m)** | **Crown area (m2)** |
| --- | --- | --- | --- | --- | --- |
| 1 | Exotic | 2.0 | 1.5 | 1.0 | 2.4 |
| 2 | Exotic | 10.0 | 6.0 | 3.0 | 47.1 |
| 3 | Exotic | 1.5 | 1.5 | 0.8 | 1.8 |
| 4 | Exotic | 1.4 | 1.2 | 0.8 | 1.3 |
| 5 | Exotic | 1.7 | 2.0 | 1.4 | 2.7 |
| 6 | Exotic | 4.0 | 5.0 | 1.3 | 15.7 |
| 7 | Native | 10.0 | 3.0 | 0.6 | 23.6 |
| 8 | Exotic | 3.0 | 3.0 | 1.5 | 7.1 |
| 9 | Exotic | 7.0 | 6.0 | 4.0 | 33.0 |
| 10 | Exotic | 3.0 | 3.0 | 1.3 | 7.1 |
| 11 | Exotic | 2.0 | 2.0 | 1.5 | 3.1 |
| 12 | Exotic | 2.0 | 2.0 | 1.5 | 3.1 |
| 13 | Exotic | 3.0 | 2.5 | 1.6 | 5.9 |
